# Supplementary material
Source: Springer Nature journal article supplement (https://www.springermedizin.de/resource/supplementary/13063_2013_2159_MOESM1_ESM.pdf/9621504)
Supplement: MOESM1 [file 9621504]

4 months

9 months

1 month

9 months

Baseline

Mixing

washout

Cycling

Baseline

Cycling

Mixing
